# Supplementary material
Source: PubMed Central journal article supplement (PMC4366611)
Supplement: supp_bht275_bht275supp_fig1.pdf [file supp_bht275_bht275supp_fig1.pdf]

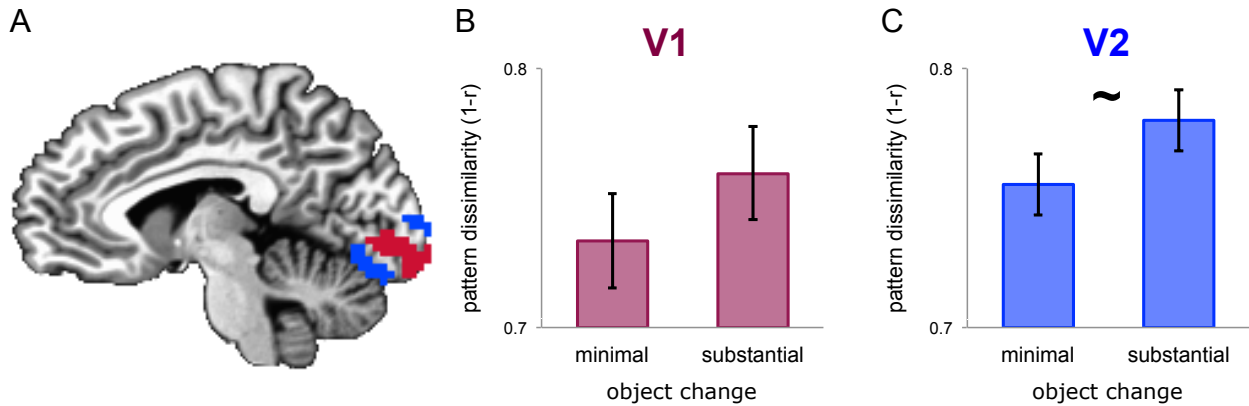

**Figure S1. Pattern analysis of early visual cortex based on probabilistic maps of V1 and V2.**

(A) Anatomical definition of ventral and dorsal V1 and V2 based on probabilistic retinotopy atlases (Wang et al., 2012). (B) Pattern dissimilarity for substantial-change and minimal-change conditions in V1 and V2. In V1, pattern dissimilarity did not reliably differ across conditions, and object-change ratings did not reliably predict pattern dissimilarity ( $p$ 's > .1). In V2, there was a marginally reliable pattern-dissimilarity difference across conditions ( $t(13) = 2.06, p = .06$ ), and a similar trend in a linear model based on the object-change ratings ( $t(13) = 2.12, p = .05$ ). The finding that change-specific pattern dissimilarity effects were strongest in V2 is consistent with neuroimaging and neurophysiology evidence of stimulus selectivity in striate and extrastriate visual cortex (Hegd e and Van Essen 2000; Wilkinson et al. 2000). However, this pattern-dissimilarity difference between V1 and V2 did not approach statistical significance in either the condition-based or ratings-based analysis ( $p$ 's > .9). Tilde signifies  $p = .06$ .
