# Supplementary material
Source: PubMed Central journal article supplement (PMC4366611)
Supplement: supp_bht275_bht275supp_fig2.pdf [file supp_bht275_bht275supp_fig2.pdf]

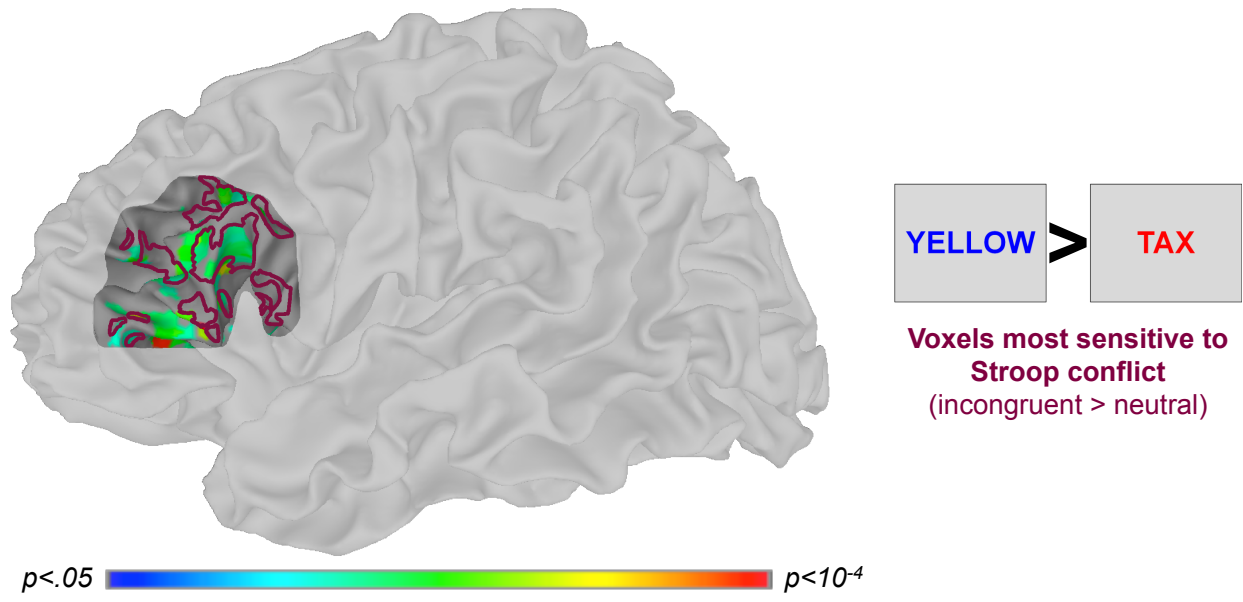

**Figure S2. Pattern-predicted activation and Stroop-sensitive voxels in left pVLPFC.** Overlap in left pVLPFC of the 250 voxels most sensitive to Stroop conflict (outlined in maroon) and voxels with pattern predicted activation with one-tailed  $p < .05$ .
