# Supplementary material
Source: PubMed Central journal article supplement (PMC4366611)
Supplement: supp_bht275_bht275supp_fig3.pdf [file supp_bht275_bht275supp_fig3.pdf]

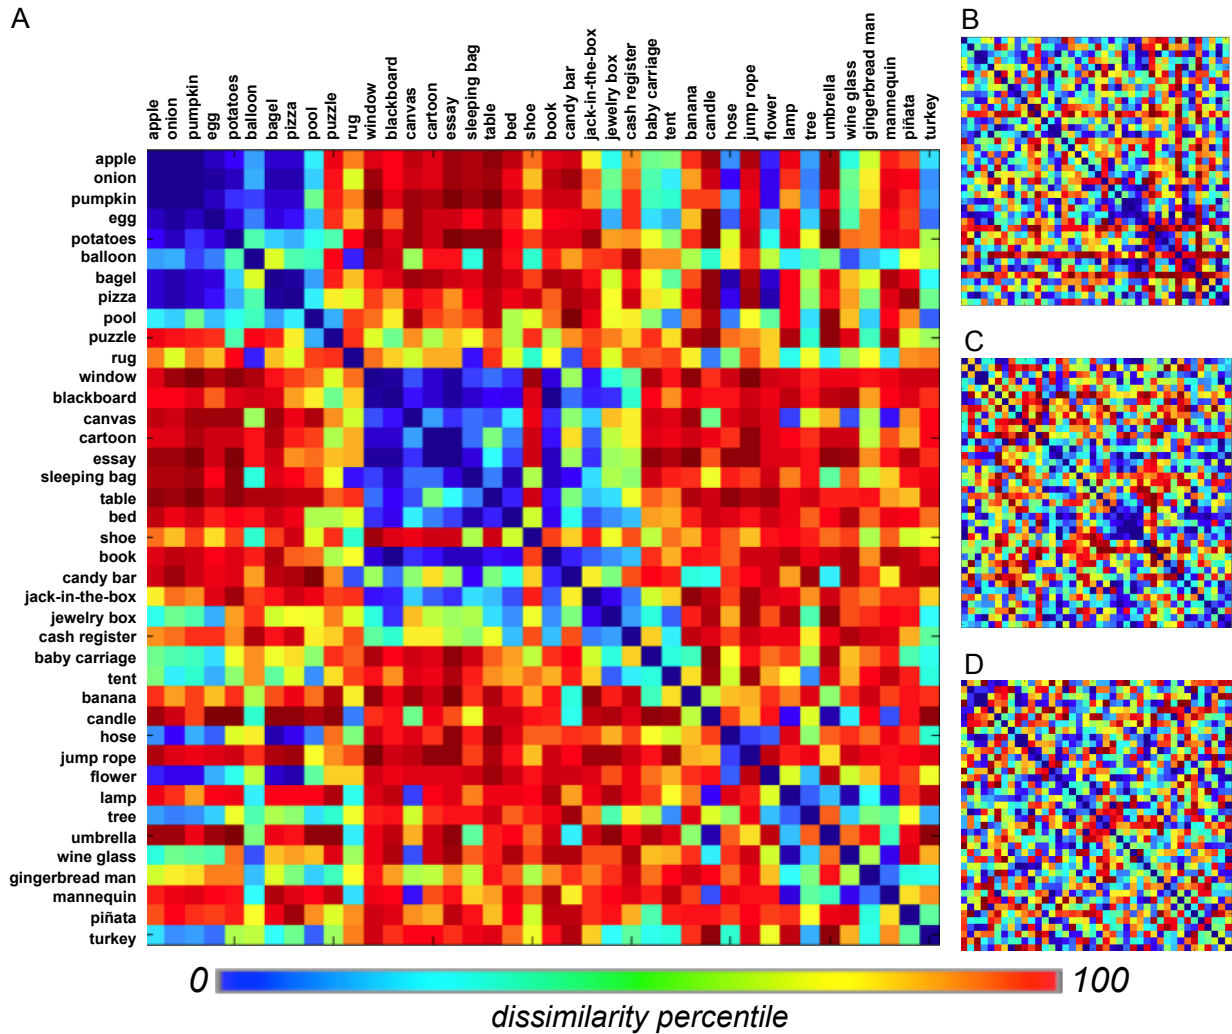

**Figure S3. Between-object dissimilarity for visualizing the initial state of each object.** (A) Dissimilarity matrix composed of shape-dissimilarity ratings; (B) pattern dissimilarity matrix for early visual cortex, averaged across subjects for the purpose of display; (C) averaged pattern dissimilarity matrix for late visual cortex; (D) averaged pattern dissimilarity matrix for left pVLPFC. While shape-dissimilarity ratings reliably predicted pattern dissimilarity in late visual cortex ( $p < .005$ ), they did not reliably predict pattern dissimilarity in either early visual cortex or left pVLPFC ( $p$ 's  $> .3$ ).
