# Supplementary material
Source: PubMed Central journal article supplement (PMC4366611)
Supplement: supp_bht275_bht275supp_table1.pdf [file supp_bht275_bht275supp_table1.pdf]

**Table S1. State-change comprehension items.** Each subject saw each item in only one of the two conditions.

A = action minimally changes object

B = action substantially changes object

- |     |                                |                                 |
|-----|--------------------------------|---------------------------------|
| 1.  | A) sniff the flower            | B) pluck the flower             |
| 2.  | A) yell at the jack-in-the-box | B) pop open the jack-in-the-box |
| 3.  | A) reach for the apple         | B) bite into the apple          |
| 4.  | A) smile at the candy bar      | B) unwrap the candy bar         |
| 5.  | A) feel the egg                | B) crack open the egg           |
| 6.  | A) grip the hose               | B) unravel the hose             |
| 7.  | A) ask about the banana        | B) peel the banana              |
| 8.  | A) reach for the shoe          | B) tie the shoe                 |
| 9.  | A) tap on the blackboard       | B) draw on the blackboard       |
| 10. | A) comment on the umbrella     | B) open the umbrella            |
| 11. | A) measure the jump rope       | B) cut up the jump rope         |
| 12. | A) skim through the essay      | B) mark up the essay            |
| 13. | A) laugh at the cartoon        | B) color in the cartoon         |
| 14. | A) count the potatoes          | B) mash the potatoes            |
| 15. | A) ask about the book          | B) open up the book             |
| 16. | A) gripe about the bed         | B) make up the bed              |
| 17. | A) weigh the pumpkin           | B) carve the pumpkin            |
| 18. | A) sit in front of the candle  | B) blow out the candle          |
| 19. | A) pick up the balloon         | B) inflate the balloon          |
| 20. | A) marvel at the puzzle        | B) break apart the puzzle       |

21. A) stand beside the mannequin      B) dress up the mannequin
22. A) step over the sleeping bag      B) roll up the sleeping bag
23. A) touch the jewelry box      B) open the jewelry box
24. A) sniff the onion      B) chop the onion
25. A) sit next to the lamp      B) turn off the lamp
26. A) step over the rug      B) unroll the rug
27. A) blow on the pizza      B) slice the pizza
28. A) touch the gingerbread man      B) decorate the gingerbread man
29. A) tap the wine glass      B) crack the wine glass
30. A) point at the tree      B) chop down the tree
31. A) peer into the tent      B) take apart the tent
32. A) bang on the cash register      B) open up the cash register
33. A) touch the canvas      B) paint on the canvas
34. A) tap on the table      B) set the table
35. A) kneel beside the window      B) open up the window
36. A) walk around the pool      B) drain the pool
37. A) point at the piñata      B) knock down the piñata
38. A) smell the bagel      B) slice the bagel
39. A) kneel beside the baby carriage      B) fold up the baby carriage
40. A) poke at the turkey      B) cut up the turkey
